# Supplementary material for: Theoretical Evaluation of Sulfur-Based Reactions as a Model for Biological Antioxidant Defense
Source: MDPI journal article supplement (doi:10.3390/ijms232314515), 2022-11-22
Supplement: s1 [file s1]

## SUPPORTING INFORMATION

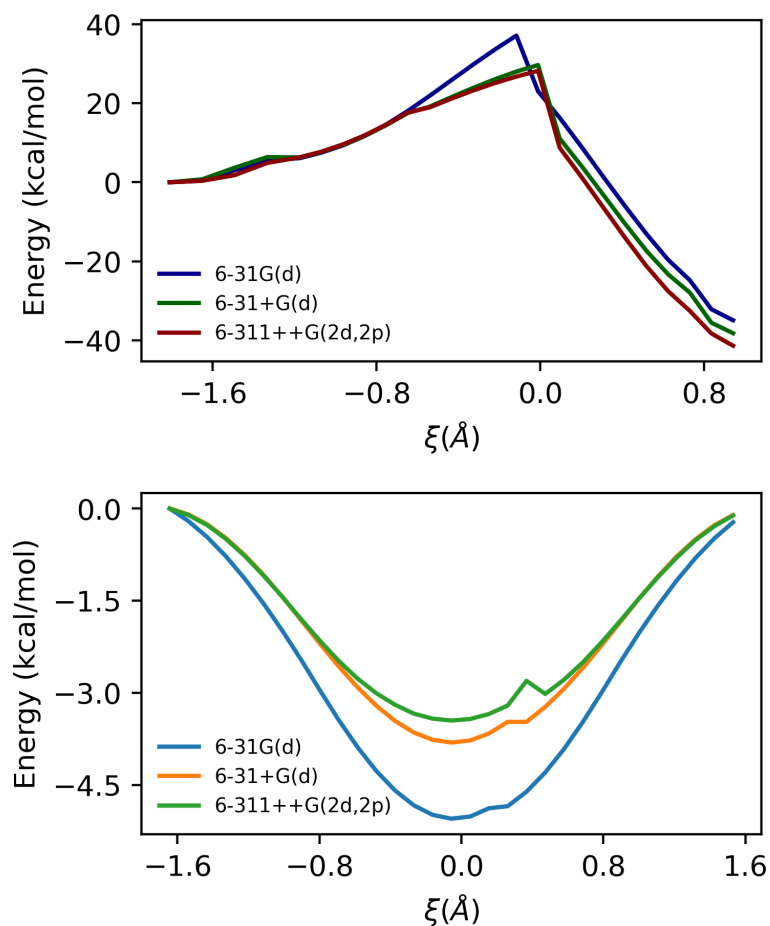

Figure S1: Upper panel: Relative energy associated to ethyl methyl sulfide oxidation by  $\text{H}_2\text{O}_2$ . Bottom panel: effect of the basis set with an increasing number of diffuse functions on the energy profile for the thiol/disulfide exchange reaction.

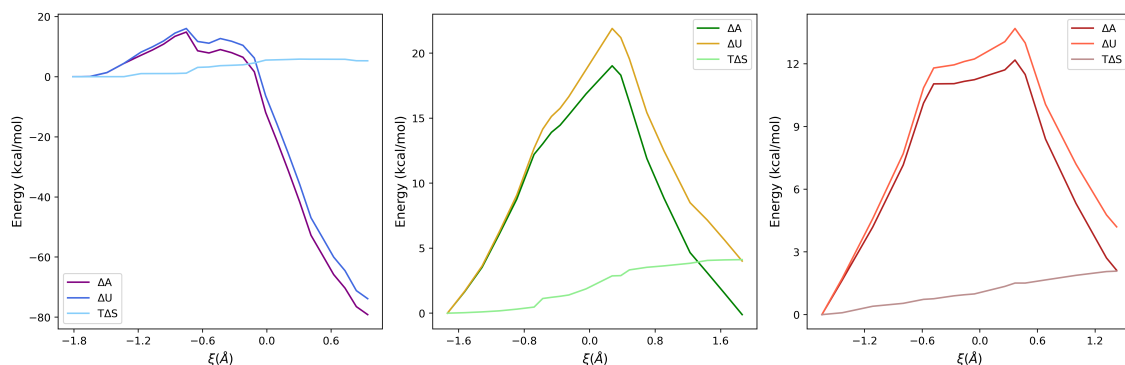

Figure S2: Internal energy, free energy and entropy (expressed as  $T\Delta S$ ) variation along the reaction coordinate for Met oxidation in water (*left*), mercaptoethanol in water (*middle*) and butanethiol in DMF (*right*).

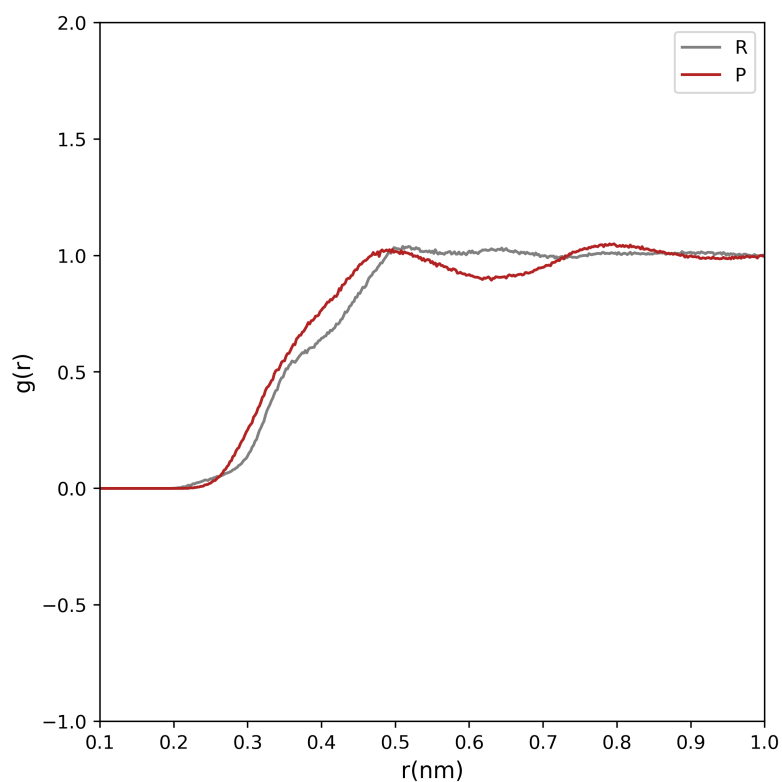

Figure S3: Sulfur-oxygen radial distribution function for Methionine (R) and Methionine sulfoxide (P) in water. The maximum of the function at  $\approx 5.5$  Å was chosen to select the water molecules belonging to the first solvation shell.

Table S1: ESP atomic charges (B3LYP/6-311++G(2d,2p)) of the three electronegative centers involved in the investigated reactions. Their structures and the corresponding MOs are reported in Figure 2. Partial atomic charges are reported in atomic units.

| scan point                 | Atom     | ESP partial charges (a.u.) |         |        |         |         |         |
|----------------------------|----------|----------------------------|---------|--------|---------|---------|---------|
|                            |          | point 1                    | point 2 | point3 | point 4 | point 5 | point 6 |
| <i>Sulfide oxidation</i>   | S        | -0.21                      | -0.30   | -0.08  | 0.07    | 0.03    | 0.25    |
|                            | $O_P$    | -0.42                      | -0.25   | -0.25  | -0.30   | -0.36   | -0.40   |
|                            | $O_D$    | -0.38                      | -0.42   | -0.57  | -0.75   | -0.65   | -0.83   |
| <i>Disulfides exchange</i> | $S_{Nu}$ | -0.89                      | -0.78   | -0.61  | -0.56   | -0.42   | -0.28   |
|                            | $S_C$    | -0.03                      | 0.06    | 0.08   | 0.08    | 0.06    | 0.02    |
|                            | $S_{LG}$ | -0.26                      | -0.43   | -0.61  | -0.67   | -0.80   | -0.87   |
|                            |          | Reaction coordinate (Å)    |         |        |         |         |         |
| $\xi_{SO}$                 |          | -1.81                      | -1.07   | 0.54   | 0.01    | 0.09    | 0.9     |
| $\xi_{SS}$                 |          | -1.64                      | -1.01   | -0.16  | 0.26    | 0.68    | 1.43    |

In Table S1 with  $\xi_{SO}$  and  $\xi_{SS}$  we referred to the reaction coordinate for Met oxidation and thiol/disulfide exchange reaction, respectively.

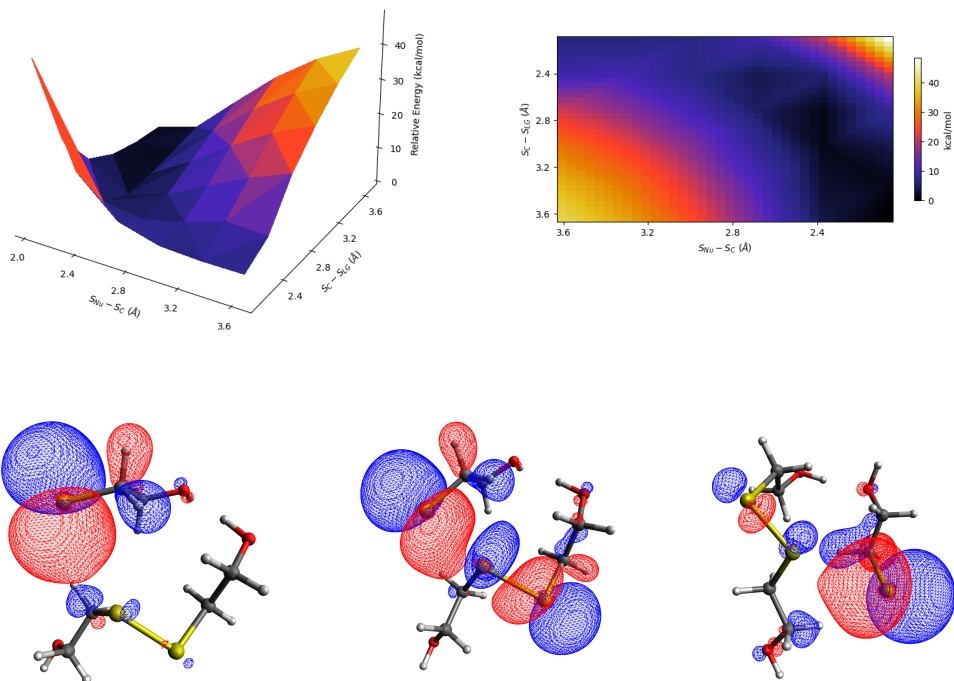

Figure S4: Upper panel: from left to right, the 3D and 2D PES scan for ME system (minimum at  $\xi = -0.573$  Å). Bottom panel: HOMO for reactants, TS and product state, calculated at the B3LYP/6-311++G(2d,2p) level of theory.

Table S2: ESP atomic charges (B3LYP/6-311++G(2d,2p)) of the three sulfur atoms for ME calculated in six points along the reaction coordinate.

| scan point                                  | Atom     | ESP partial charges (a.u.) |         |        |         |         |         |
|---------------------------------------------|----------|----------------------------|---------|--------|---------|---------|---------|
|                                             |          | point 1                    | point 2 | point3 | point 4 | point 5 | point 6 |
| <i>Disulfides exchange</i><br>( <i>ME</i> ) | $S_{Nu}$ | -0.85                      | -0.80   | -0.51  | -0.60   | -0.35   | -0.25   |
|                                             | $S_C$    | -0.16                      | -0.18   | -0.25  | -0.24   | -0.19   | -0.09   |
|                                             | $S_{LG}$ | -0.26                      | -0.35   | -0.65  | -0.58   | -0.80   | -0.86   |
|                                             |          | Reaction coordinate (Å)    |         |        |         |         |         |
| $\xi_{ss}$                                  |          | -1.74                      | -1.10   | -0.36  | -0.04   | 0.91    | 1.65    |
